# Supplementary material
Source: PubMed Central journal article supplement (PMC5783652)
Supplement: EHP1535.s001.acco.pdf [file EHP1535.s001.acco.pdf]

**Note to readers with disabilities:** *EHP* strives to ensure that all journal content is accessible to all readers. However, some figures and Supplemental Material published in *EHP* articles may not conform to [508 standards](#) due to the complexity of the information being presented. If you need assistance accessing journal content, please contact [ehp508@niehs.nih.gov](mailto:ehp508@niehs.nih.gov). Our staff will work with you to assess and meet your accessibility needs within 3 working days.

### **Supplemental Material**

#### **Towards Consistent Methodology to Quantify Populations in Proximity to Oil and Gas Development: A National Spatial Analysis and Review**

Eliza D. Czolowski, Renee L. Santoro, Tanja Srebotnjak, Seth B.C. Shonkoff

This Supplemental Appendix provides detailed tables of results from the proximal population study across all buffer distances, as well as a detailed discussion of the caveats and advantages of various population allocation methods.

#### **Table of Contents**

##### **PART I: RESULTS TABLES**

**Table S1.** National population living in proximity to a confirmed-active oil and/or gas well, all buffer distances, by demographic

**Table S2.** National population living in proximity to a confirmed-active oil and/or gas well, all buffer distances, by well type and primary production category.

**Note:** Percentages sum to greater than 100 due to proximal overlap in well type buffers.

**Table S3.** Populations living in proximity to a confirmed-active oil and/or gas well, 400 m, 800 m, and 1600m buffers by state.

##### **PART II. WELL TYPE UNCERTAINTY**

##### **PART III. POPULATION ALLOCATION METHODS**

##### **References**

**PART I: RESULTS TABLES**

| Buffer Distance       | 100 m   |      | 400 m     |      | 800 m     |      | 1000 m     |      | 1600 m     |      | 2000 m     |      |
|-----------------------|---------|------|-----------|------|-----------|------|------------|------|------------|------|------------|------|
|                       | Count   | %    | Count     | %    | Count     | %    | Count      | %    | Count      | %    | Count      | %    |
| Total                 | 320,000 | –    | 3,710,000 | –    | 8,890,000 | –    | 11,300,000 | –    | 17,600,000 | –    | 21,300,000 | –    |
| Age 5 and under       | 23,400  | 7.3  | 280,000   | 7.6  | 686,000   | 7.7  | 875,000    | 7.8  | 1,370,000  | 7.8  | 1,660,000  | 7.8  |
| Age under 18          | 75,600  | 23.6 | 891,000   | 24.0 | 2,150,000 | 24.2 | 2,730,000  | 24.2 | 4,270,000  | 24.2 | 5,160,000  | 24.2 |
| Age 75 and older      | 20,600  | 6.4  | 239,000   | 6.4  | 558,000   | 6.3  | 700,000    | 6.2  | 1,080,000  | 6.2  | 1,300,000  | 6.1  |
| Hispanic              | 34,000  | 10.6 | 432,000   | 11.6 | 1,240,000 | 13.9 | 1,660,000  | 14.8 | 2,900,000  | 16.5 | 3,680,000  | 17.3 |
| Non-Hispanic Minority | 36,400  | 11.4 | 422,000   | 11.4 | 1,150,000 | 12.9 | 1,520,000  | 13.5 | 2,560,000  | 14.5 | 3,200,000  | 15.0 |
| Minority              | 51,700  | 16.2 | 610,000   | 16.4 | 1,680,000 | 18.9 | 2,240,000  | 19.9 | 3,820,000  | 21.7 | 4,810,000  | 22.6 |

**Supplemental Material, Table S1.** National population living in proximity to a confirmed-active oil and/or gas well, all buffer distances, by demographic.

| Well Data Category | 100 m   |      | 400 m     |      | 800 m     |      | 1000 m     |      | 1600 m     |      | 2000 m     |      |
|--------------------|---------|------|-----------|------|-----------|------|------------|------|------------|------|------------|------|
|                    | Count   | %    | Count     | %    | Count     | %    | Count      | %    | Count      | %    | Count      | %    |
| Producing          | 318,000 | 99.5 | 3,690,000 | 99.3 | 8,790,000 | 98.9 | 11,100,000 | 98.7 | 17,300,000 | 98.2 | 20,900,000 | 98.0 |
| Recently drilled   | 5,690   | 1.8  | 108,000   | 2.9  | 462,000   | 5.2  | 726,000    | 6.4  | 1,830,000  | 10.4 | 2,740,000  | 12.9 |
| Oil                | 110,000 | 34.3 | 1,130,000 | 30.3 | 3,140,000 | 35.3 | 4,290,000  | 38.1 | 8,000,000  | 45.4 | 10,600,000 | 49.7 |
| Wet gas            | 56,400  | 17.6 | 864,000   | 23.3 | 2,420,000 | 27.2 | 3,180,000  | 28.2 | 5,400,000  | 30.7 | 6,880,000  | 32.3 |
| Dry gas            | 158,000 | 49.4 | 2,020,000 | 54.5 | 4,940,000 | 55.6 | 6,280,000  | 55.7 | 9,710,000  | 55.1 | 11,600,000 | 54.6 |

**Supplemental Material, Table S2.** National population living in proximity to a confirmed-active oil and/or gas well, all buffer distances, by well type and primary production category.

Note: Percentages sum to greater than 100 due to proximal overlap in well type buffers.

| <b>State</b>         | <b>400 m</b> | <b>800 m</b> | <b>1600 m</b> | <b>State</b>       | <b>400 m</b> | <b>800 m</b> | <b>1600 m</b> |
|----------------------|--------------|--------------|---------------|--------------------|--------------|--------------|---------------|
| <i>Ohio</i>          | 762,000      | 2,090,000    | 2,800,000     | <i>Virginia</i>    | 26,800       | 44,700       | 67,200        |
| <i>Texas</i>         | 729,000      | 1,690,000    | 4,520,000     | <i>Mississippi</i> | 13,000       | 34,300       | 90,500        |
| <i>Pennsylvania</i>  | 504,000      | 964,000      | 1,650,000     | <i>Tennessee</i>   | 7,840        | 19,500       | 41,800        |
| <i>West Virginia</i> | 316,000      | 601,000      | 919,000       | <i>Wyoming</i>     | 4,730        | 13,500       | 34,300        |
| <i>Oklahoma</i>      | 312,000      | 868,000      | 1,750,000     | <i>Utah</i>        | 4,020        | 13,000       | 31,900        |
| <i>California</i>    | 273,000      | 762,000      | 2,090,000     | <i>Montana</i>     | 3,620        | 9,980        | 27,700        |
| <i>Kentucky</i>      | 133,000      | 261,000      | 407,000       | <i>N. Dakota</i>   | 3,080        | 12,400       | 40,900        |
| <i>Colorado</i>      | 131,000      | 255,000      | 429,000       | <i>Florida</i>     | 680          | 2,350        | 7,620         |
| <i>New York</i>      | 119,000      | 333,000      | 790,000       | <i>Nebraska</i>    | 600          | 2,190        | 6,830         |
| <i>Louisiana</i>     | 94,1000      | 255,000      | 639,000       | <i>Missouri</i>    | 110          | 750          | 4,350         |
| <i>New Mexico</i>    | 86,900       | 150,000      | 195,000       | <i>Maryland</i>    | 38           | 140          | 610           |
| <i>Arkansas</i>      | 64,000       | 175,000      | 302,000       | <i>Oregon</i>      | 18           | 56           | 190           |
| <i>Kansas</i>        | 50,800       | 154,000      | 373,000       | <i>S. Dakota</i>   | 12           | 36           | 77            |
| <i>Michigan</i>      | 45,400       | 117,000      | 297,000       | <i>Arizona</i>     | 9            | 14           | 73            |
| <i>Alabama</i>       | 28,800       | 54,000       | 97,100        | <i>Nevada</i>      | 0            | 1            | 2             |

**Supplemental Material, Table S3.** Populations living in proximity to a confirmed-active oil and/or gas well, 400 m, 800 m, and 1600m buffers by state.

## **PART II. WELL TYPE UNCERTAINTY**

The range of well type counts reflects uncertainty in the count of unconventional wells as classified according to producing formation. This method classifies 772 coalbed methane wells (CBM; as reported by state agencies) as unconventional and 38,990 CBM wells as conventional.

Coalbed methane has traditionally been defined as an unconventional resource, but in recent years is more commonly viewed as conventional. The unconventional category also includes 21,045 wells completed prior to commercial economic viability of high-volume hydraulic fracturing, horizontal drilling methods, and clustered development on multi-well pads (circa 2001; Wang and Krupnick 2013). While these wells may target unconventional geologic resources, they cannot be considered modern unconventional wells from a technological standpoint. The low end of the unconventional range (86,016 wells) is equal to the count of horizontal wellbores which report a producing formation matched to the EIA listing of tight formations. The high end of the unconventional count (106,428 wells) is equal to the number of wells classified, as per producing target, as unconventional which are not reported as a CBM well and/or completed prior to 2001. Conventional well counts are reported as the difference between total well count and unconventional well count.

### **PART III. POPULATION ALLOCATION METHODS**

The method used in allocating population data to well spatial data can also cause large variance in reported results. The simplest method for allocating populations is spatial coincidence, whereby if an environmental health hazard is located within a population aggregation unit (census block, block group, tract), then the entire population of the block is assumed to be at risk. This method is limited and inflates the count of population at risk. Vector proximity apportionment and dasymetric mapping are more commonly used and result in relatively less error.

Vector proximity analysis overlays population aggregation units and a buffered distance surrounding environmental health hazard points to determine the population count within the buffer area of the hazard source. The most basic method is complete apportionment, wherein if

any part of an aggregated population unit intersects the buffer, then the entire population of the unit is allocated to the buffer. This method differs slightly from spatial coincidence in that more than one population aggregation unit is potentially counted. Like the spatial coincidence method, this method also tends to overestimate the affected population, as demonstrated in results from Gold and McGinty (2013). Slightly improved versions allocate the entire population aggregation units only if a substantial portion of the population unit overlays the source buffer, or if residential portions of population aggregation unit, as determined by land-use maps, intersect the source buffer, as done in various ways by Ogneva-Himmelberger and Huang (2015). A significantly improved method is proportional population apportionment, used by Srebotnjak et al (2014), Ridlington et al. (2015), and the current study. This method assumes that populations are evenly distributed across aggregated population units, and allocates population based on the measured proportion of area intersection. A caveat to this method is that the assumption of an evenly distributed population is rarely valid, although the effect of this population heterogeneity is most limited at the smallest-level census unit, the block, used in this study.

Population can also be allocated by dasymetric mapping techniques. Dasymetry is an alternative aerial apportionment method that uses additional ancillary information, such as road networks, impervious surfaces, or, most commonly, land cover data to infer more granular information on where people live (Mennis 2003, 2015; Saporito et al. 2007; Sleeter 2004). This technique was incorporated in previous oil and gas proximity analyses by Slonecker and Milheim (2015), and Clough and Bell (2016). Their approach to dasymetry involved reclassifying a continuous surface of land cover data as residential or non-residential using binary coding. Counts attributed to aggregated population units were then transferred to the portion of the unit that was classified as residential, and from this point the analysis continued with proportional population

apportionment. Using this type of dasymetry produces population allocation results that align with areas categorized in land cover datasets as developed. Hence, we could have applied dasymetric data to census enumeration units, in this case census blocks, to gain insight into where populations are distributed within each block, to address the common (but overly restrictive) assumption that populations are evenly distributed throughout census units. As census block data is already presented at a fine-grained scale, dasymetry is not as beneficial as it would have been had we used larger census units, such as block groups or census tracts, that inherently have greater heterogeneity, and thus we did not use dasymetry. One downside to dasymetry is that the ancillary data in most cases does not distinguish between types of developed urban land, and can therefore not differentiate between residential land and commercial or industrial land (Mennis 2003), which can result in the mis-allocation of populations to developed non-residential areas. In addition, raster land cover datasets are classified into land cover types by computer algorithms and are known to misclassify land use types in some cases (Hollister et al. 2004; Wickham et al. 2013). Also, land cover data provide no information on demographic distributions, such as age, race, or ethnicity. We could assume that demographics are distributed evenly throughout the populated areas of a census unit, but considering the history of racial and ethnic segregation geographically in this country (Fischer et al. 2004; Lee et al. 2008), that assumption would be unlikely to hold true.

## References

- Clough E, Bell D. 2016. Just fracking: a distributive environmental justice analysis of unconventional gas development in Pennsylvania, USA. *Environ. Res. Lett.* 11:025001; doi:10.1088/1748-9326/11/2/025001.
- Fischer CS, Stockmayer G, Stiles J, Hout M. 2004. Distinguishing the geographic levels and social dimensions of U.S. metropolitan segregation, 1960–2000. *Demography* 41:37–59; doi:10.1353/dem.2004.0002.
- Gold R, McGinty T. 2013. Energy Boom Puts Wells in America's Backyards. *Wall Street Journal*. Available: <http://www.wsj.com/news/articles/SB10001424052702303672404579149432365326304> [accessed 8 April 2016].
- Hollister JW, Gonzalez ML, Paul JF, August PV, Copeland JL. 2004. Assessing the accuracy of National Land Cover Dataset area estimates at multiple spatial extents. *Photogrammetric Engineering & Remote Sensing* 70:405–414; doi:10.14358/PERS.70.4.405.
- Lee BA, Reardon SF, Firebaugh G, Farrell CR, Matthews SA, O'Sullivan D. 2008. Beyond the Census Tract: Patterns and determinants of racial segregation at multiple geographic scales. *American Sociological Review* 73:766–791; doi:10.1177/000312240807300504.
- Mennis J. 2003. Generating surface models of population using dasymetric mapping. *The Professional Geographer* 55:31–42; doi:10.1111/0033-0124.10042.
- Mennis J. 2015. Increasing the accuracy of urban population analysis with dasymetric mapping. *Cityscape* 17: 115–126.
- Ogneva-Himmelberger Y, Huang L. 2015. Spatial distribution of unconventional gas wells and human populations in the Marcellus Shale in the United States: Vulnerability analysis. *Applied Geography* 60:165–174; doi:http://dx.doi.org/10.1016/j.apgeog.2015.03.011.
- Ridlington E, Dutzik T, Van Heeke T, Garber A, Masur D. 2015. Dangerous and close: Fracking near Pennsylvania's most vulnerable residents. Available: [http://pennenvironmentcenter.org/sites/environment/files/reports/PA\\_Close\\_Fracking\\_screen.pdf](http://pennenvironmentcenter.org/sites/environment/files/reports/PA_Close_Fracking_screen.pdf) [accessed 1 February 2016].
- Saporito S, Chavers JM, Nixon LC, McQuiddy MR. 2007. From here to there: Methods of allocating data between census geography and socially meaningful areas. *Social Science Research* 36:897–920; doi:10.1016/j.ssresearch.2006.05.004.
- Sleeter R. 2004. Dasymetric mapping techniques for the San Francisco Bay region, California. In: *Urban and Regional Information Systems Association Annual Conference Proceedings*, 7-10 November, 2004, Reno, Nevada.



Slonecker ET, Milheim LE. 2015. Landscape Disturbance from Unconventional and Conventional Oil and Gas Development in the Marcellus Shale Region of Pennsylvania, USA. *Environments* 2:200–220; doi:10.3390/environments2020200.

Srebotnjak T, Rotkin-Ellman M, Natural Resources Defense Council. 2014. Drilling in California: Who's at risk? Available: <http://www.nrdc.org/health/files/california-fracking-risks-report.pdf> [accessed 1 February 2016].

Wang Z, Krupnick A. 2013. A retrospective review of shale gas development in the United States. Available: <http://www.rff.org/files/sharepoint/WorkImages/Download/RFF-DP-13-12.pdf> [accessed 21 December 2016].

Wickham JD, Stehman SV, Gass L, Dewitz J, Fry JA, Wade TG. 2013. Accuracy assessment of NLCD 2006 land cover and impervious surface. *Remote Sensing of Environment* 130:294–304; doi:10.1016/j.rse.2012.12.001.
